# Supplementary material
Source: publisher site journal article supplement (https://www.dovepress.com/article/382685)
Supplement: Supplementary file 1 [file get_supplementary_file.php]

**Supplementary materials**

**Table S1** HIV Sero-positive Status and Related Characteristics of Pregnant Women Attending ANC in Referral Hospitals of Amhara Regional State, Ethiopia, 2021 (n=349)

| Variables | Number (n=349) | Percentage (%) |
| --- | --- | --- |
| **Duration living with HIV** |  |  |
| Below five years | 147 | 42.12 |
| Six and above years | 202 | 57.88 |
| **On ART** |  |  |
| No | 2 | 0.57 |
| Yes | 347 | 99.43 |
| **ART started (n=**347**)** |  |  |
| During the current pregnancy | 23 | 6.63 |
| Before the current pregnancy | 324 | 93.37 |
| **How long on ART (n=**347**)** |  |  |
| Below five years | 167 | 48.13 |
| Above six years | 180 | 51.87 |
| **Discloser status (**n =349**)** |  |  |
| No | 33 | 9.46 |
| yes | 316 | 90.54 |
| **To whom you disclosed (n= 316)** |  |  |
| Husband | 244 | 77.22 |
| Family | 45 | 14.24 |
| Other | 27 | 8.54 |
| **ART Regimen (n=**347**)** |  |  |
| 1st line regimens | 331 | 95.39 |
| 2nd line regimens | 16 | 4.61 |
| **Opportunistic infections** |  |  |
| No | 324 | 92.84 |
| Yes | 25 | 7.16 |
| **Husband tested for HIV** |  |  |
| No | 158 | 45.27 |
| Yes | 191 | 54.73 |
| **Husband HIV status (N =192)** |  |  |
| Positive | 153 | 80.10 |
| Negative | 38 | 19.90 |

**Table S2** Adverse pregnancy outcome Among Pregnant Women Attending ANC in Referral Hospitals of Amhara Regional State, Ethiopia, 2021 (n=678)

| Variables | **HIV sero-status** | | | P value |
| --- | --- | --- | --- | --- |
| HIV +ve (n=349), n (%) | HIV –ve (n=329), n (%) | Total n=678, n (%) |  |
| **Adverse outcome at least one type** |  |  |  | Pr = 0.002 |
| No | 226(64.76) | 249(75.68) | 475(70.06) |  |
| Yes | 123(35.24) | 80(24.32) | 203(29.94) |  |
| **Stillbirth** |  |  |  | Pr = 0.585 |
| No | 336(96.28) | 314 (95.44) | 650(95.87) |  |
| Yes | 13 (3.72) | 15(4.56) | 28(4.13) |  |
|  |  |  | **Total n=650 (excluding still birth), n (%)** |  |
| **Low birth weight** |  |  |  | Pr = 0.033 |
| No | 253 (75.30) | 258 (82.17) | 511(78.62) |  |
| Yes | 83(24.70) | 56(17.83) | 139(21.38) |  |
| **Prematurity** |  |  |  | 0.229 |
| No | 300(89.29) | 289(92.04) | 589(90.62) |  |
| Yes | 36(10.71) | 25(7.96) | 61(9.38) |  |
